# Supplementary material
Source: publisher figshare collection journal article supplement (https://springernature.figshare.com/ndownloader/files/7092773)
Supplement: Supplementary file [file 7092773]

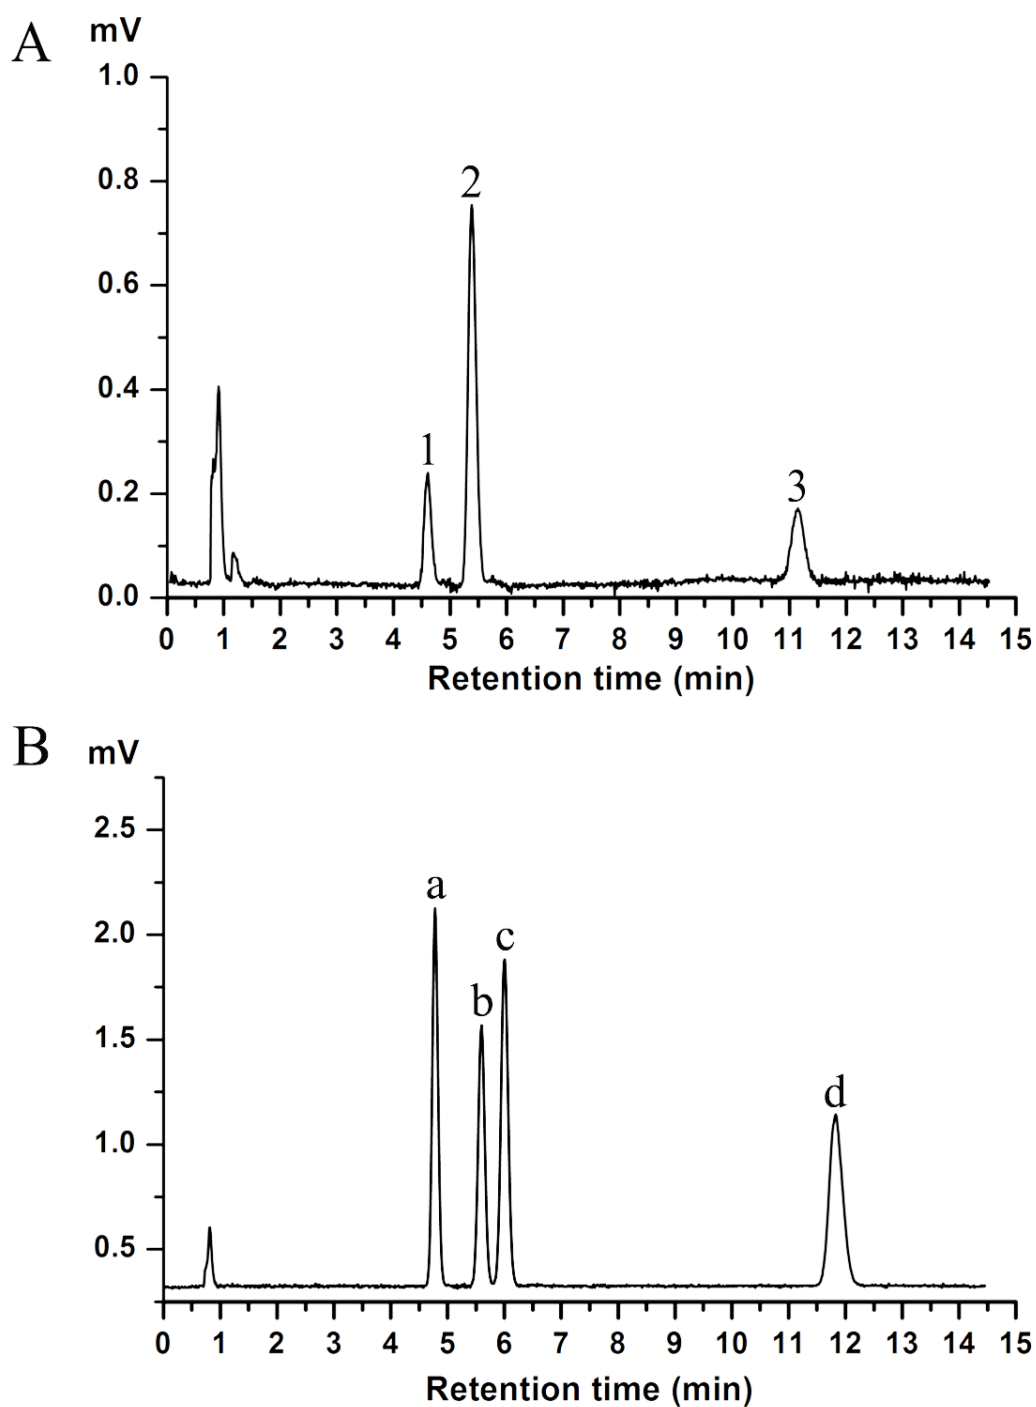

**Fig. S1 GC profile.** (A) GC profile of the headspace of the *E.coli* trans109 strain containing pSTV165HF after incubation for 10 h at 37 °C. (B) GC profile of isoamylene and isoprene standard. (a) 3-methyl-1-butene; (b) 2-methyl-2-butene; (c) 2-methyl-1-butene; (d) isoprene.

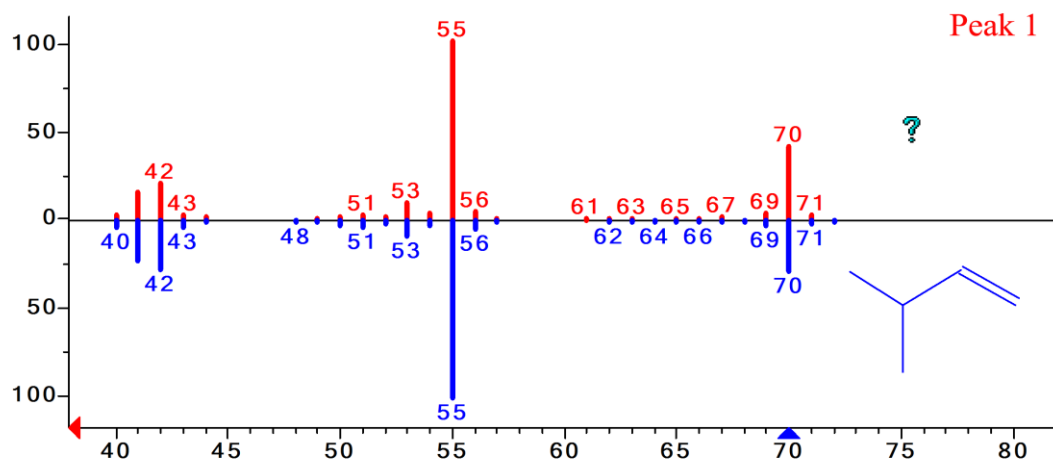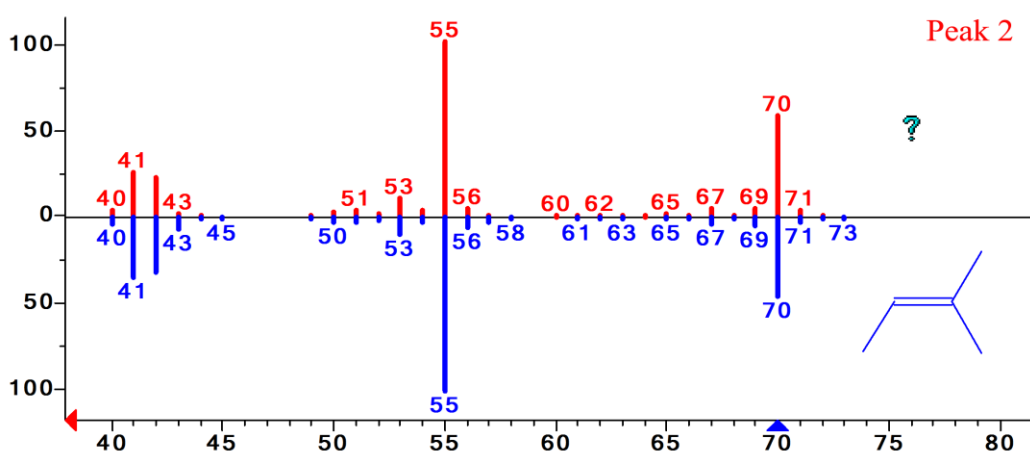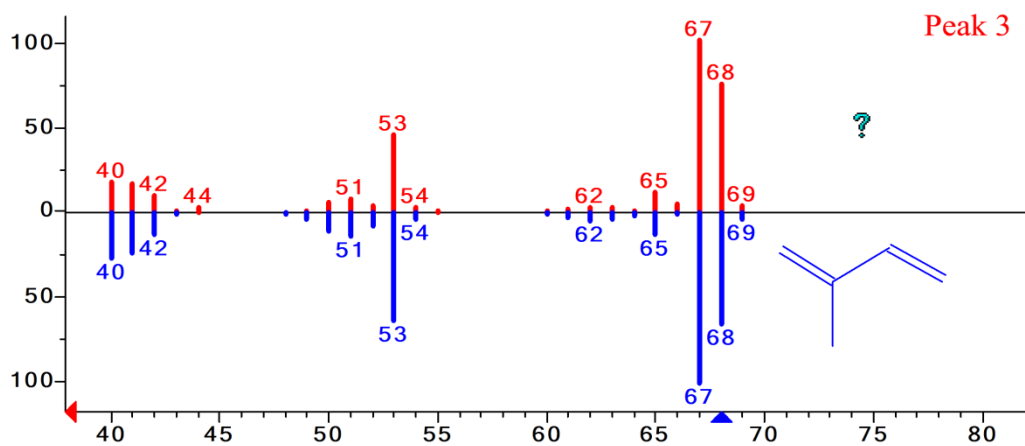

**Fig. S2.** Identification of the unknown substances in the headspace of the liquid cultures by GC-MS analysis. Red is the mass spectrum of the sample, Blue is the mass spectrum of the standard. Peak 1, Peak 2 and Peak 3 are identified to be 3-methyl-1-butene, 2-methyl-2-butene and isoprene respectively.

Table S1. Isoamylene and isoprene reaction system production under various conditions

| Supplements |     |     |     |       |                  | Isoamylene/Isoprene |
|-------------|-----|-----|-----|-------|------------------|---------------------|
| IspH        | FNR | Fdx | Fld | NADPH | Mg <sup>2+</sup> | production          |
| -           | +   | +   | -   | +     | +                | -                   |
| +           | -   | +   | -   | +     | +                | -                   |
| +           | +   | -   | +   | +     | +                | -                   |
| +           | +   | +   | -   | -     | +                | -                   |
| +           | +   | +   | -   | +     | +                | +                   |
| +           | +   | +   | -   | +     | -                | +                   |

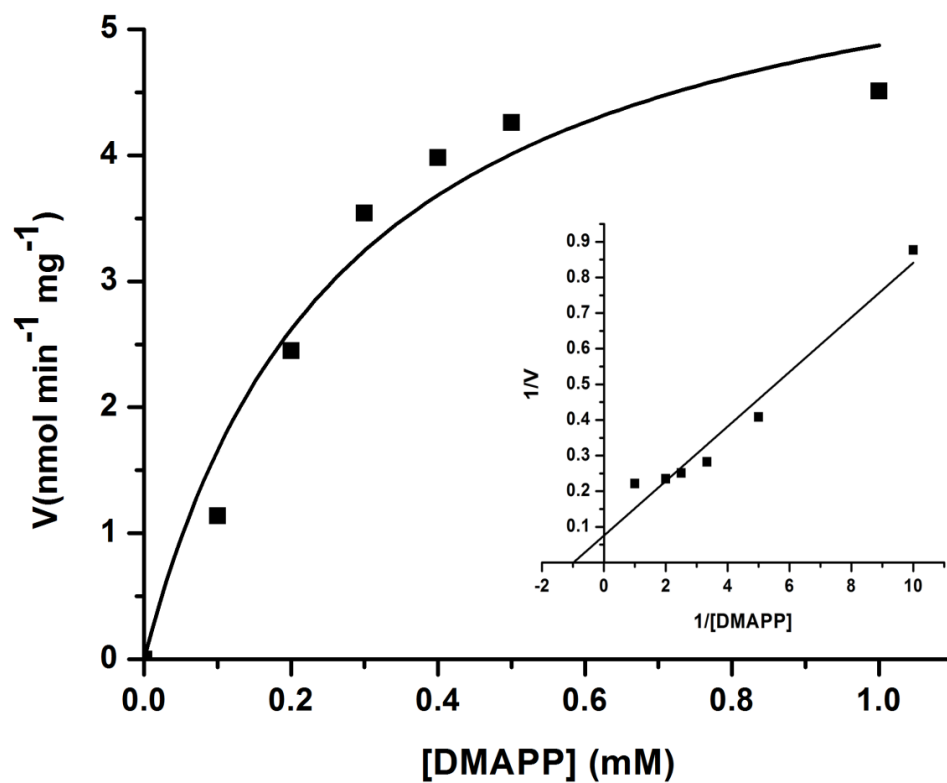

**Fig. S3.** Michaelis-Menten plot of the activity of the recombinant protein IspH toward DMAPP. DMAPP concentrations were varied from 0 to 1 mM. The  $K_m$  value for DMAPP was approximately 275  $\mu\text{M}$ . The inset shows the Lineweaver-Burk plot.

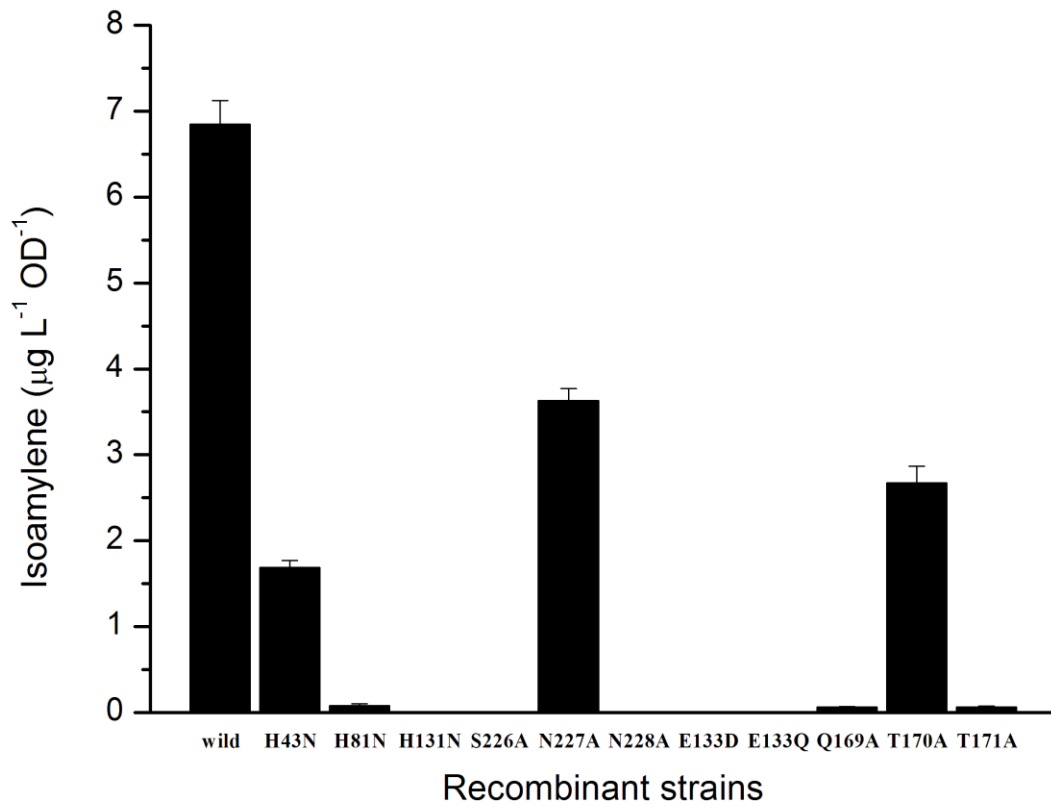

**Fig. S4.** Isoamylene production of the recombinant strains in which wild-type IspH and the IspH mutants were expressed. Error bars represent the standard deviations of three replicates.

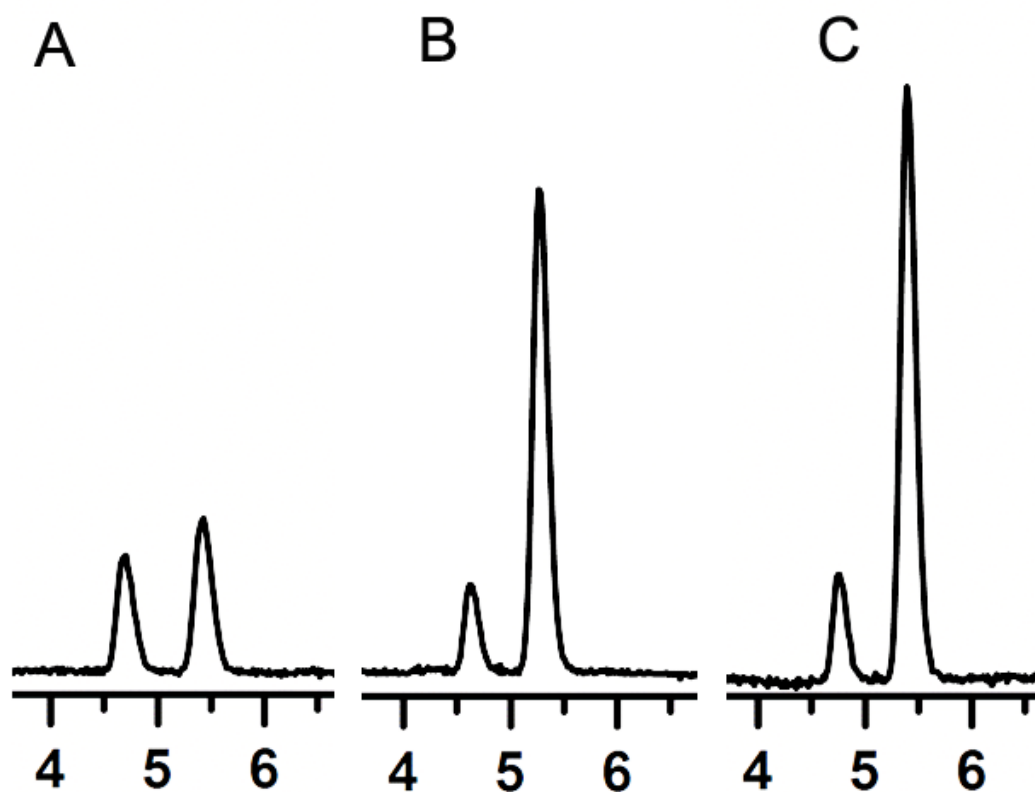

**Fig. S5.** GC profile of isoamylene (2M2B and 3M1B) produced by the recombinant *E. coli* strains. A. The production of *E. coli* trans109 strain containing pSTV12HF, the ratio of 2M2B (2.1  $\mu\text{g/L}$ ) and 3M1B (1.4  $\mu\text{g/L}$ ) is approximately 1.5:1. B. The production of of *E. coli* trans109 strain containing pSTV168HF, the ratio of 2M2B (6.1  $\mu\text{g/L}$ ) and 3M1B (1.2  $\mu\text{g/L}$ ) is approximately 5:1. C. The production of the *E. coli* trans109 strain containing pSTV165HF, the ratio of 2M2B (7.3  $\mu\text{g/L}$ ) and 3M1B (1.4  $\mu\text{g/L}$ ) is approximately 5:1.

**Table S2 Strains and plasmids in this study**

| Strain or plasmid            | Genotype or relevant characteristic                                                                                                                   | Source or reference |
|------------------------------|-------------------------------------------------------------------------------------------------------------------------------------------------------|---------------------|
| <b><i>E. coli</i></b>        |                                                                                                                                                       |                     |
| BL21(DE3)                    | <i>F ompT gal dcm lon hsdS<sub>B</sub>(r<sub>B</sub><sup>-</sup> m<sub>B</sub><sup>-</sup>) λ(DE3 [lacI lacUV5-T7gene1 ind1 sam7 nin5])</i>           | TransGen Biotech    |
| <i>Trans DMT</i>             | <i>F φ80 lacZΔM15 Δ(lacZYA-argF)U169 recA1 endA1 hsdR17(r<sub>K</sub><sup>-</sup>, m<sub>K</sub><sup>+</sup>) phoA supE44 thi-1 gyrA96 relA1 tonA</i> | TransGen Biotech    |
| <i>Trans109</i>              | <i>endA1 recA1 gyrA96 thi-1 hsdR17 (r<sub>k</sub><sup>-</sup>m<sub>k</sub><sup>+</sup>)relA1 supE44 D (lac-proAB) [F'traD36 proAB laqI qZΔM15]</i>    | TransGen Biotech    |
| <b><i>Bacillus</i></b>       |                                                                                                                                                       |                     |
| <i>Bacillus</i> sp. N16-5    | A facultative alkaliphilic strain, producing isoprene                                                                                                 | Laboratory stock    |
| N165D1                       | Δ <i>fer</i>                                                                                                                                          | This study          |
| N165D2                       | Δ <i>fld</i>                                                                                                                                          | This study          |
| N165H                        | <i>Bacillus</i> sp. N16-5 containing pMH                                                                                                              | This study          |
| N165D1H                      | N165D1 containing pMH                                                                                                                                 | This study          |
| N165D2H                      | N165D2 containing pMH                                                                                                                                 | This study          |
| <i>Bacillus subtilis</i> 168 | used for <i>ispH</i> and <i>fer</i> gene amplification                                                                                                | Laboratory stock    |
| <b>Plasmid</b>               |                                                                                                                                                       |                     |
| pSTV28                       | <i>E. coli</i> cloning vector; Cm <sup>r</sup>                                                                                                        | TaKaRa              |
| pSTV165H                     | pSTV28 containing the <i>ispH</i> gene from <i>Bacillus</i> sp. N16-5                                                                                 | This study          |
| pSTV165HF                    | pSTV28 containing the <i>fer</i> gene and the <i>ispH</i> gene from <i>Bacillus</i> sp. N16-5                                                         | This study          |
| pSTV168HF                    | pSTV28 containing the <i>fer</i> gene and the <i>ispH</i> gene from <i>Bacillus subtilis</i> 168                                                      | This study          |
| pSTV12HF                     | pSTV28 containing the <i>fld</i> gene and the <i>ispH</i> gene from <i>Escherichia coli</i>                                                           | This study          |
| pNNB194                      | Shuttle vector used for gene disruption; Amp <sup>r</sup> Erm <sup>r</sup>                                                                            | Laboratory stock    |
| pND1                         | pNNB194 containing a 1.6 kb fragment fused by two 800 bp homologous regions flanking the <i>fer</i> gene                                              | This study          |
| pND2                         | pNNB194 containing a 1.6 kb fragment fused by two 800 bp homologous regions flanking the <i>fld</i> gene                                              | This study          |
| pMK4                         | Shuttle vector used for gene expression; Amp <sup>r</sup> Cm <sup>r</sup>                                                                             | Laboratory stock    |
| pMH                          | pMK4 containing the <i>ispH</i> gene under the control of the P <sub><i>ldh</i></sub> promoter                                                        | This study          |
| pET-28a(+)                   | used for expression of IspH, FNR and ferredoxin proteins from <i>Bacillus</i> sp. N16-5                                                               | Novagen             |

**Table S3 Primers used in this study**

| <b>Primer</b> | <b>Sequence (5'→3')</b> <sup>a</sup>                                            | <b>Purpose</b>                   |
|---------------|---------------------------------------------------------------------------------|----------------------------------|
| QFLAupF       | <u>CGGGATCC</u> ATCACGTGATCATATTATTGC                                           | pND1<br>construction             |
| QFLAupR       | TCGTTATTTTAAGGTAGTAGCGCTTGCAAATACGAGTA<br>ATAC                                  | pND1<br>construction             |
| QFLAdownF     | GTATTACTCGTATTTGCAAGCGCTACTACCTTAAAATA<br>ACGA                                  | pND1<br>construction             |
| QFLAdownR     | <u>CGGAATTC</u> GATCAAGTTATGAAGCTTTCACG                                         | pND1<br>construction<br>excision |
| QFLAF         | CTATTCCTTGCTGTTCCGATGGC                                                         | confirmation<br>excision         |
| QFLAR         | ACATGAGGAGGTAGTTGTTAATGG                                                        | confirmation<br>pND1             |
| QFERupF       | <u>CGGAATTC</u> CTGTAGCCTGTGCTGAATGATG<br>ACCGGTGGCCGATTATTTACACAAAAGCCTCCCATTA | construction<br>pND1             |
| QFERupR       | AG<br>CTTTAATGGGAGGCTTTTGTGTAATAATCGGCCACCG                                     | construction<br>pND1             |
| QFERdownF     | GT                                                                              | construction<br>pND1             |
| QFERdownR     | <u>CGGGATCC</u> TCAATCAAATGTCATATAAACG                                          | construction<br>excision         |
| QFERF         | CCATAATCGATACATTACCGTG                                                          | confirmation<br>excision         |
| QFERR         | CATGGTCCATCTCCTAACGTGC                                                          | confirmation<br>pMH              |
| MPldhupF      | <u>CCGGAATTC</u> CTGATGGTAGGACGCTTGTA<br>GGAAATTTTCAAAACCTCCATGTTTAAACATCTACCTT | construction<br>pMH              |
| MPldh275F     | TCCC<br>GGGAAAGGTAGATGTTTAAACATGGAGGTTTTGAAAA                                   | construction<br>pMH              |
| M275PldhR     | TTTCC                                                                           | construction<br>pMH              |
| M275downR     | <u>CGGGATCC</u> TTAGGCCCGCTCCGCTTTTTTCTTTCTC                                    | construction                     |

<sup>a</sup> Underlined, restriction enzyme recognition sites.
